# Supplementary material for: Benthic Archaea as potential sources of tetraether membrane lipids in sediments across an oxygen minimum zone
Source: Copernicus journal article supplement (doi:10.5194/bg-2017-289), 2017-07-19

## 1    **Supplementary figure legends**

2    **Fig. S1.** Structures of isoprenoid core-GDGTs discussed in the text (left) and the most commonly detected IPL  
3    types (right).

4    **Fig. S2.** HPLC-ESI/MS Extracted ion current (EIC) of  $m/z$  1643.4549 within 3 ppm mass accuracy representing  
5    the ammoniated molecule of DH-GDGT-0 in subsurface sediment (10-12 cm) at 1306 mbsl. The chromatogram  
6    shows three separate peaks representing three different isomers (the peak at 19.39 min is the signal of the second  
7    isotopologue of GDGT-1). MS<sup>2</sup> mass spectra of each of the three isomers are shown in panel a-c in order of  
8    retention time. Panel a shows a single fragment ion at  $m/z$  1302. Panel b shows an additional fragment ion at  $m/z$   
9    1284. Panel c shows a main fragmentation product at  $m/z$  1464. The fragmentation product at  $m/z$  1302 shown in  
10    panel a represents the core lipid of GDGT-0 resulting from the loss of 2 hexose moieties from DH-GDGT-0,  
11    with 1 hexose moiety attached to either side of the molecule. The additional fragment ion at  $m/z$  1284 shown in  
12    panel b represents the loss of an additional water from the GDGT-0 core lipid, which can only occur if a free  
13    alcohol moiety is present and thus both hexose moieties are postulated to be attached to one side of the GDGT-0  
14    molecule. Panel C shows the loss of a single hexose from the  $m/z$  1643 parent, but no further fragmentation.  
15    suggesting that this isomer is in fact the IPL-type HCP GDGT, where the hexose is positioned at the opposite  
16    side from the cyclopentanetetraol moiety. If the hexose moiety would have been bound to the  
17    cyclopentanetetraol moiety, as suggested by Sturt et al., 2004, an additional loss of water from the MH-GDGT-0  
18    would have been expected, similar to what was observed in the fragmentation of DH-GDGT-0 shown in panel b.

# Isoprenoid GDGTs

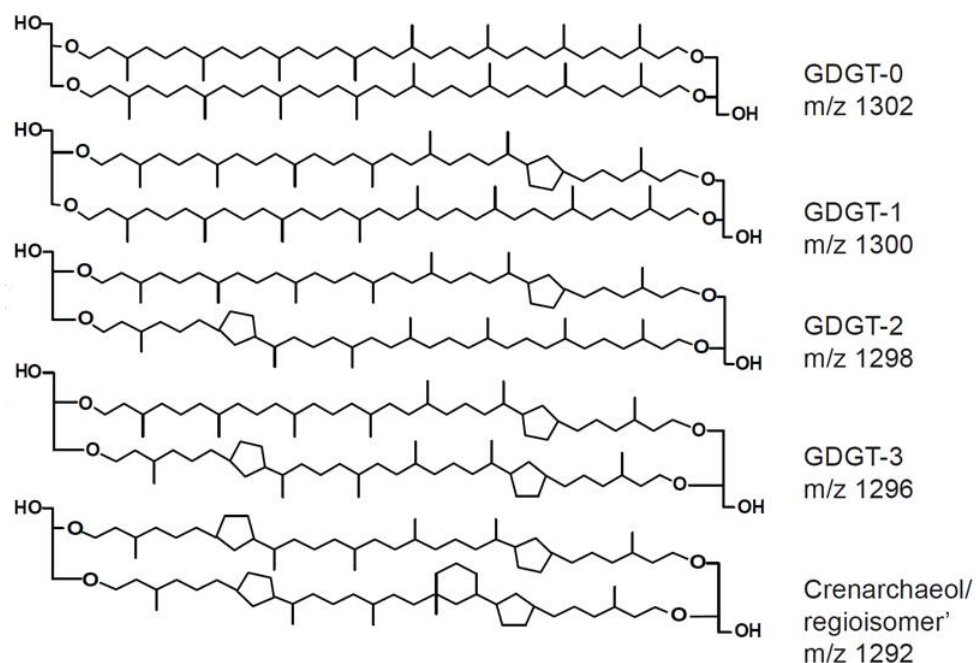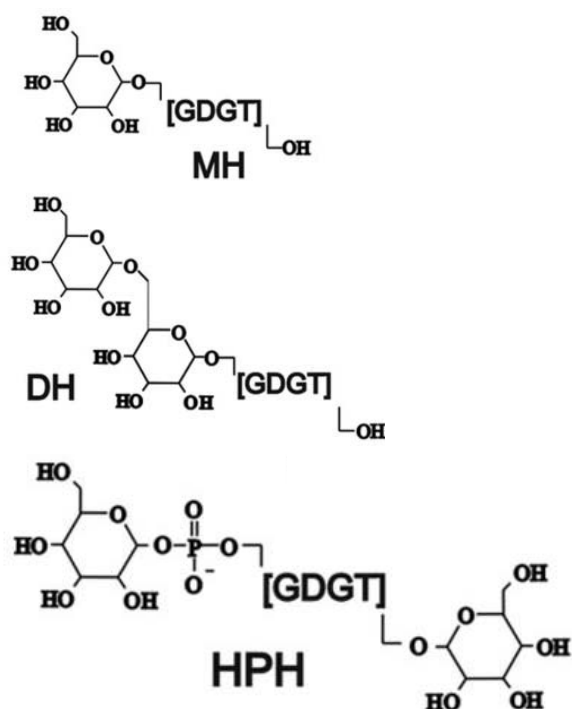

34 **Table S1. PCR primers, efficiency and R<sup>2</sup> of the QPCR assays**

| QPCR (gene) | Primers                  | Ref                  | Efficiency | R <sup>2</sup> |
|-------------|--------------------------|----------------------|------------|----------------|
| 16S rRNA    | Parch519F/ARC915R        | Pitcher et al., 2011 | 99.8       | 0.96           |
| 16S rRNA    | Parch519F/ARC915R        | Pitcher et al., 2011 | 87.5       | 1.00           |
| 16S rRNA    | Parch519F/ARC915R        | Pitcher et al., 2011 | 90.0       | 0.99           |
| <i>AmoA</i> | CrenAmoAQ-F/CrenAmoAModR | Pitcher et al., 2011 | 97.5       | 1.00           |
| <i>AmoA</i> | CrenAmoAQ-F/CrenAmoAModR | Pitcher et al., 2011 | 78.5       | 1.00           |

35

36

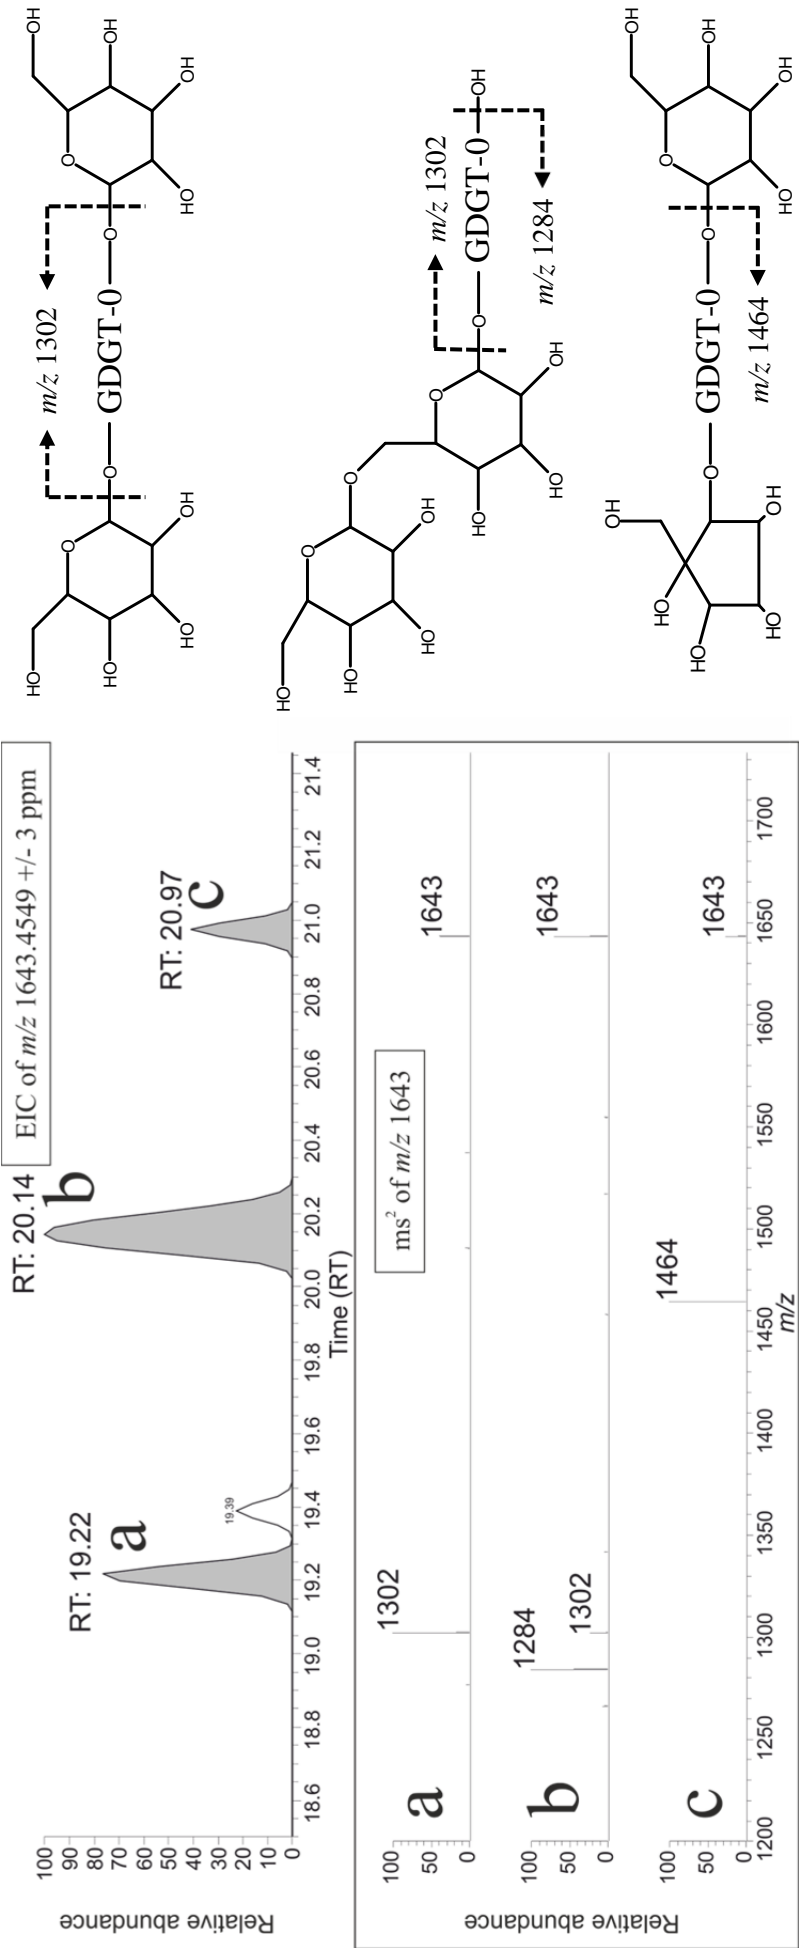

Supplement: Supplementary file 1 [file bg-2017-289-supplement.zip › Supplementary figures and tables.pdf]
