# Supplementary material for: Benthic Archaea as potential sources of tetraether membrane lipids in sediments across an oxygen minimum zone
Source: Copernicus journal article supplement (doi:10.5194/bg-2017-289), 2017-07-19
Supplement: Supplementary file 1 [file bg-2017-289-supplement.zip]

Archive with 2 entries (2 files):
- IPL-GDGTs exact masses.xlsx
- Supplementary figures and tables.pdf
