# Supplementary material for: Benthic Archaea as potential sources of tetraether membrane lipids in sediments across an oxygen minimum zone
Source: Copernicus journal article supplement (doi:10.5194/bg-2017-289), 2017-07-19
Supplement: Supplementary file 1 [file bg-2017-289-supplement.zip › IPL-GDGTs exact masses.xlsx]

## Sheet: Sheet1
GDGT exact masses																																													diether exact masses
						double charged
			adduct								adduct							adduct						adduct						adduct						adduct						adduct						adduct
GDGT-0		H+	NH4+	Na+	-H2O	2x H+		OH-GDGT-0		H+	NH4+	Na+			diOH-GDGT-0		H+	NH4+	Na+		GDBT-0		H+	NH4+	Na+		GDPT-0		H+	NH4+	Na+		GDD-0		H+	NH4+	Na+		OH-GDD-0		H+	NH4+	Na+		archaeol		H+	NH4+	Na+
	elemental composition								elemental composition							elemental composition						elemental composition						elemental composition						elemental composition						elemental composition						elemental composition
core	C86O6H172	1302.32			1284.31			core	C86O7H172	1318.32					core	C86O8H172	1334.31				core	C87O6H174	1316.34				core	C88O6H176	1330.35				core	C83O5H168	1246.3				core	C83O6H168	1262.29				core	C43O3H88	653.681
MH	C92O11H182	1464.38	1481.4	1486.36				MH	C92O12H182	1480.37	1497.4	1502.35			MH	C92O13H182	1496.37	1513.39	1518.35		MH	C93O11H184	1478.39	1495.42	1500.37		MH	C94O11H186	1492.41	1509.43	1514.39		MH	C89O10H178	1408.35	1425.38	1430.33		MH	C89O11H178	1424.34	1441.37	1446.33		MH	C49O8H98	815.733	832.76	837.715
DH	C98O16H192	1626.43	1643.45	1648.41				DH	C98O17H192	1642.42	1659.45	1664.41			DH	C98O18H192	1658.42	1675.44	1680.4		DH	C99O16H194	1640.44	1657.47	1662.43		DH	C100O16H196	1654.46	1671.49	1676.44		DH	C95O15H188	1570.4	1587.43	1592.38		DH	C95O16H188	1586.4	1603.42	1608.38		DH	C55O13H108	977.786	994.813	999.768
TH	C104O21H202	1788.48	1805.51	1810.46				TH	C104O22H202	1804.48	1821.5	1826.46			TH	C104O23H202	1820.47	1837.5	1842.45		TH	C105O21H204	1802.5	1819.52	1824.48		TH	C106O21H206	1816.51	1833.54	1838.49		TH	C101O20H198	1732.45	1749.48	1754.44		TH	C101O21H198	1748.45	1765.48	1770.43		PH	C49O11H99P	895.7	912.726	917.682
TetraH	C110O26H212	1950.53	1967.56	1972.52				TetraH	C110O27H212	1966.53	1983.56	1988.51			TetraH	C110O28H212	1982.52	1999.55	2004.51		TetraH	C111O26H214	1964.55	1981.58	1986.53		TetraH	C112O26H216	1978.57	1995.59	2000.55		TetraH	C107O25H208	1894.51	1911.53	1916.49		TetraH	C107O26H208	1910.5	1927.53	1932.48		HPH	C55O16H109P	1057.75	1074.78	1079.73
PH	C92O14H183P	1544.34	1561.37	1566.32				PH	C92O15H183P	1560.34	1577.36	1582.32			PH	C92O16H183P	1576.33	1593.36	1598.31		PH	C93O14H185P	1558.36	1575.38	1580.34		PH	C94O14H187P	1572.37	1589.4	1594.36		PH	C89O13H179P	1488.32	1505.34	1510.3		PH	C89O14H179P	1504.31	1521.34	1526.29		PG	C46O8H95P	807.684	824.71	829.666
HPH	C98O19H193P	1706.39	1723.42	1728.38				HPH	C98O20H193P	1722.39	1739.42	1744.37			HPH	C98O21H193P	1738.38	1755.41	1760.37		HPH	C99O19H195P	1720.41	1737.44	1742.39		HPH	C100O19H197P	1734.43	1751.45	1756.41		HPH	C95O18H189P	1650.37	1667.39	1672.35		HPH	C95O19H189P	1666.36	1683.39	1688.35		PE	C45O6H94PN	776.689		798.671
DH-PH	C104O24H203P	1868.45	1885.47	1890.43				DH-PH	C104O25H203P	1884.44	1901.47	1906.42			DH-PH	C104O26H203P	1900.44	1917.46	1922.42		DH-PH	C105O24H205P	1882.46	1899.49	1904.45		DH-PH	C106O24H207P	1896.48	1913.51	1918.46		DH-PH	C101O23H199P	1812.42	1829.45	1834.4		DH-PH	C101O24H199P	1828.42	1845.44	1850.4		PS	C46O8H94PN	820.679		842.661
Glua	C92O12H180	1478.35	1495.38	1500.34				Glua	C92O13H180	1494.35	1511.38	1516.33			Glua	C92O14H180	1510.34	1527.37	1532.33		Glua	C93O12H182	1492.37	1509.4	1514.35		Glua	C94O12H184	1506.39	1523.41	1528.37		Glua	C89O11H176	1422.33	1439.36	1444.31		Glua	C89O12H176	1438.32	1455.35	1460.31		H-MeH	C56O13H110	991.802	1008.83	1013.78
HGlua	C98O17H190	1640.41	1657.43	1662.39				Hglua	C98O18H190	1656.4	1673.43	1678.38			Hglua	C98O19H190	1672.4	1689.42	1694.38		Hglua	C100O17H192	1654.42	1671.45	1676.41		Hglua	C100O17H194	1668.44	1685.47	1690.42		Hglua	C95O16H186	1584.38	1601.41	1606.36		Hglua	C95O17H186	1600.38	1617.4	1622.36		gluA	C49O9H96	829.713	846.739
diHGlua	C104O22H200	1802.46	1819.49	1824.44				diHGlua	C104O23H200	1818.46	1835.48	1840.44			diHGlua	C104O24H200	1834.45	1851.48	1856.43		diHGlua	C106O22H202	1816.48	1833.5	1838.46		diHGlua	C106O22H204	1830.49	1847.52	1852.47		diHGlua	C103O21H196	1746.43	1763.46	1768.42		diHGlua	C103O22H196	1762.43	1779.46	1784.41		H-gluA	C55O14H106	991.766	1008.79	1013.75
Glua-pH	C98O20H191P	1720.37	1737.4	1742.36
PG	C89O11PH179	1456.33	1473.35	1478.31				PG	C89O12PH179	1472.32	1489.35	1494.3			PG	C89O13PH179	1488.32	1505.34	1510.3		PG	C90O11PH181	1470.34	1487.37	1492.32		PG	C91O11PH183	1484.36	1501.38	1506.34		PG	C86O10PH175	1400.3	1417.33	1422.28		PG	C86O11PH175	1416.29	1433.32	1438.28
2PG	C92O16P2H186	1610.33	1627.36	1632.31				2PG	C92O17P2H186	1626.32	1643.35	1648.31			2PG	C92O18P2H186	1642.32	1659.35	1664.3		2PG	C93O16P2H188	1624.34	1641.37	1646.33		2PG	C94O16P2H190	1638.36	1655.39	1660.34		2PG	C89O15P2H182	1554.3	1571.33	1576.28		2PG	C89O16P2H182	1570.3	1587.32	1592.28
MH-PG	C95O16H189P	1618.38	1635.41	1640.36		809.693		MH-PG	C95O17H189P	1634.37	1651.4	1656.36			MH-PG	C95O18H189P	1650.37	1667.39	1672.35		MH-PG	C96O16H191P	1632.39	1649.42	1654.38		MH-PG	C97O16H193P	1646.41	1663.44	1668.39		MH-PG	C92O15H185P	1562.35	1579.38	1584.33		MH-PG	C92O16H185P	1578.35	1595.37	1600.33		3 unsaturated archaeol
DH-PG	C101O21H199P	1780.43	1797.46	1802.41		890.719		DH-PG	C101O22H199P	1796.43	1813.45	1818.41			DH-PG	C101O23H199P	1812.42	1829.45	1834.4		DH-PG	C102O21H201P	1794.45	1811.47	1816.43		DH-PG	C103O21H203P	1808.46	1825.49	1830.44		DH-PG	C98O20H195P	1724.41	1741.43	1746.39		DH-PG	C98O21H195P	1740.4	1757.43	1762.38			elemental composition
MH-2PG	C98O21H196P2	1772.38	1789.41	1794.36				MH-2PG	C98O22H196P2	1788.38	1805.4	1810.36			MH-2PG	C98O23H196P2	1804.37	1821.4	1826.35		MH-2PG	C99O21H198P2	1786.4	1803.42	1808.38		MH-2PG	C100O21H200P2	1800.41	1817.44	1822.39		MH-2PG	C95O20H192P2	1716.36	1733.38	1738.34		MH-2PG	C95O21H192P2	1732.35	1749.38	1754.33		core	C43O3H88	647.634
DH-2PG	C104O26H206P2	1934.43	1951.46	1956.42				DH-2PG	C104O27H206P2	1950.43	1967.46	1972.41			DH-2PG	C104O28H206P2	1966.42	1983.45	1988.41		DH-2PG	C105O26H208P2	1948.45	1965.48	1970.43		DH-2PG	C106O26H210P2	1962.47	1979.49	1984.45		DH-2PG	C101O25H202P2	1878.41	1895.43	1900.39		DH-2PG	C101O26H202P2	1894.4	1911.43	1916.39		MH	C49O8H98	809.686	826.713	831.668
MH(NH2)	C92O10H183N	1463.39																			MH(NH2)	C93O10H185N	1477.41																						DH	C55O13H108	971.739	988.766	993.721
DH(NH2)	C98O15H193N	1625.44																			DH(NH2)	C99O15H195N	1639.46																						PH	C49O11H99P	889.653	906.679	911.635
MH(Me)	C93O11H184	1478.39	1495.42	1500.37																	MH(Me)	C94O11H186	1492.41	1509.43	1514.39																				HPH	C55O16H109P	1051.71	1068.73	1073.69
DH(Me)	C99O16H194	1640.44	1657.47	1662.43																	DH(Me)	C100O16H196	1654.46	1671.49	1676.44																				PG	C46O8H95P	801.637	818.663	823.619
HPH(Me)	C99O19H195P	1720.41	1737.44	1742.39																	HPH(Me)	C100O19H197P	1734.43	1751.45	1756.41																				PE	C45O6H94PN	770.642
						double charged																																							PS	C46O8H94PN	814.632
			adduct								adduct							adduct						adduct						adduct						adduct						adduct			H-MeH	C56O13H110	985.755	1002.78	1007.74
GDGT-1		H+	NH4+	Na+	-H2O	2x H+		OH-GDGT-1		H+	NH4+	Na+			diOH-GDGT-1		H+	NH4+	Na+		GDBT-1		H+	NH4+	Na+		GDPT-1		H+	NH4+	Na+		GDD-1		H+	NH4+	Na+		OH-GDD-1		H+	NH4+	Na+		gluA	C49O9H96	823.666	840.692
	elemental composition								elemental composition							elemental composition						elemental composition						elemental composition						elemental composition						elemental composition					H-gluA	C55O14H106	985.719	1002.75	1007.7
core	C86O6H170	1300.31			1282.3			core	C86O7H170	1316.3					core	C86O8H170	1332.3				core	C87O6H172	1314.32				core	C88O6H174	1328.34				core	C83O5H166	1244.28				core	C83O6H166	1260.28
MH	C92O11H180	1462.36	1479.39	1484.34				MH	C92O12H180	1478.35	1495.38	1500.34			MH	C92O13H180	1494.35	1511.38	1516.33		MH	C93O11H182	1476.38	1493.4	1498.36		MH	C94O11H184	1490.39	1507.42	1512.37		MH	C89O10H176	1406.33	1423.36	1428.32		MH	C89O11H176	1422.33	1439.36	1444.31
DH	C98O16H190	1624.41	1641.44	1646.39				DH	C98O17H190	1640.41	1657.43	1662.39			DH	C98O18H190	1656.4	1673.43	1678.38		DH	C99O16H192	1638.43	1655.45	1660.41		DH	C100O16H194	1652.44	1669.47	1674.43		DH	C95O15H186	1568.39	1585.41	1590.37		DH	C95O16H186	1584.38	1601.41	1606.36		6 unsaturated archaeol
TH	C104O21H200	1786.47	1803.49	1808.45				TH	C104O22H200	1802.46	1819.49	1824.44			TH	C104O23H200	1818.46	1835.48	1840.44		TH	C105O21H202	1800.48	1817.51	1822.46		TH	C106O21H204	1814.5	1831.52	1836.48		TH	C101O20H196	1730.44	1747.47	1752.42		TH	C101O17H196	1746.43	1763.46	1768.42
TetraH	C110O26H210	1948.52	1965.54	1970.5				TetraH	C110O27H210	1964.51	1981.54	1986.5			TetraH	C110O28H210	1980.51	1997.53	2002.49		TetraH	C111O26H212	1962.53	1979.56	1984.52		TetraH	C112O26H214	1976.55	1993.58	1998.53		TetraH	C107O25H206	1892.49	1909.52	1914.47		TetraH	C107O26H206	1908.49	1925.51	1930.47		core	C43O3H88	641.587
PH	C92O14H181P	1542.33	1559.35	1564.31				PH	C92O15H181P	1558.32	1575.35	1580.3			PH	C92O16H181P	1574.32	1591.34	1596.3		PH	C93O14H183P	1556.34	1573.37	1578.32		PH	C94O14H185P	1570.36	1587.38	1592.34		PH	C89O13H177P	1486.3	1503.33	1508.28		PH	C89O14H177P	1502.29	1519.32	1524.28		MH	C49O8H98	803.64	820.666	825.621
HPH	C98O19H191P	1704.38	1721.41	1726.36				HPH	C98O20H191P	1720.37	1737.4	1742.36			HPH	C98O21H191P	1736.37	1753.4	1758.35		HPH	C99O19H193P	1718.39	1735.42	1740.38		HPH	C100O19H195P	1732.41	1749.44	1754.39		HPH	C95O18H187P	1648.35	1665.38	1670.33		HPH	C95O19H187P	1664.35	1681.37	1686.33		DH	C55O13H108	965.692	982.719	987.674
DH-PH	C104O24H201P	1866.43	1883.46	1888.41				DH-PH	C104O25H201P	1882.43	1899.45	1904.41			DH-PH	C104O26H201P	1898.42	1915.45	1920.4		DH-PH	C105O24H203P	1880.45	1897.47	1902.43		DH-PH	C106O24H205P	1894.46	1911.49	1916.45		DH-PH	C101O23H197P	1810.41	1827.43	1832.39		DH-PH	C101O24H197P	1826.4	1843.43	1848.38		PH	C49O11H99P	883.606	900.632	905.588
Glua	C92O12H178	1476.34	1493.37	1498.32				Glua	C92O13H178	1492.33	1509.36	1514.32			Glua	C92O14H178	1508.33	1525.36	1530.31		Glua	C93O12H180	1490.35	1507.38	1512.34		Glua	C94O12H182	1504.37	1521.4	1526.35		Glua	C89O11H174	1420.31	1437.34	1442.29		Glua	C89O12H174	1436.31	1453.33	1458.29		HPH	C55O16H109P	1045.66	1062.69	1067.64
HGlua	C98O17H188	1638.39	1655.42	1660.37				Hglua	C98O18H188	1654.39	1671.41	1676.37			Hglua	C98O19H188	1670.38	1687.41	1692.36		Hglua	C100O17H190	1652.41	1669.43	1674.39		Hglua	C101O17H192	1666.42	1683.45	1688.41		Hglua	C95O16H184	1582.37	1599.39	1604.35		Hglua	C95O17H184	1598.36	1615.39	1620.34		PG	C46O8H95P	795.59	812.616	817.572
diHGlua	C104O22H198	1800.44	1817.47	1822.43				diHGlua	C104O23H198	1816.44	1833.47	1838.42			diHGlua	C104O24H198	1832.43	1849.46	1854.42		diHGlua	C106O22H200	1814.46	1831.49	1836.44		diHGlua	C107O22H202	1828.48	1845.5	1850.46		diHGlua	C103O21H194	1744.42	1761.45	1766.4		diHGlua	C103O22H194	1760.41	1777.44	1782.4		PE	C45O6H94PN	764.595	-12.0939	786.577
PG	C89O11PH177	1454.31	1471.34	1476.29				PG	C89O12PH177	1470.31	1487.33	1492.29			PG	C89O13PH177	1486.3	1503.33	1508.28		PG	C90O11PH179	1468.33	1485.35	1490.31		PG	C91O11PH181	1482.34	1499.37	1504.32		PG	C86O10PH173	1398.28	1415.31	1420.27		PG	C86O11PH173	1414.28	1431.31	1436.26		PS	C46O8H94PN	808.585	-12.0939	830.567
2PG	C92O16P2H184	1608.31	1625.34	1630.3				2PG	C92O17P2H184	1624.31	1641.33	1646.29			2PG	C92O18P2H184	1640.3	1657.33	1662.29		2PG	C93O16P2H186	1622.33	1639.36	1644.31		2PG	C94O16P2H188	1636.34	1653.37	1658.33		2PG	C89O15P2H180	1552.29	1569.31	1574.27		2PG	C89O16P2H180	1568.28	1585.31	1590.26		H-MeH	C56O13H110	979.708	996.735	1001.69
MH-PG	C95O16H187P	1616.36	1633.39	1638.34		807.677		MH-PG	C95O17H187P	1632.36	1649.38	1654.34			MH-PG	C95O18H187P	1648.35	1665.38	1670.33		MH-PG	C96O16H189P	1630.38	1647.41	1652.36		MH-PG	C97O16H191P	1644.39	1661.42	1666.38		MH-PG	C92O15H183P	1560.34	1577.36	1582.32		MH-PG	C92O16H183P	1576.33	1593.36	1598.31		gluA	C49O9H96	817.619	834.645
DH-PG	C101O21H197P	1778.42	1795.44	1800.4		888.704		DH-PG	C101O22H197P	1794.41	1811.44	1816.39			DH-PG	C101O23H197P	1810.41	1827.43	1832.39		DH-PG	C102O21H199P	1792.43	1809.46	1814.41		DH-PG	C103O21H201P	1806.45	1823.47	1828.43		DH-PG	C98O20H193P	1722.39	1739.42	1744.37		DH-PG	C98O21H193P	1738.38	1755.41	1760.37		H-gluA	C55O14H106	979.672	996.698	1001.65
MH-2PG	C98O21H194P2	1770.37	1787.39	1792.35				MH-2PG	C98O22H194P2	1786.36	1803.39	1808.34			MH-2PG	C98O23H194P2	1802.36	1819.38	1824.34		MH-2PG	C99O21H196P2	1784.38	1801.41	1806.36		MH-2PG	C100O21H198P2	1798.4	1815.42	1820.38		MH-2PG	C95O20H190P2	1714.34	1731.37	1736.32		MH-2PG	C95O21H190P2	1730.33	1747.36	1752.32
DH-2PG	C104O26H204P2	1932.42	1949.45	1954.4				DH-2PG	C104O27H204P2	1948.41	1965.44	1970.4			DH-2PG	C104O28H204P2	1964.41	1981.44	1986.39		DH-2PG	C105O26H206P2	1946.43	1963.46	1968.42		DH-2PG	C106O26H208P2	1960.45	1977.48	1982.43		DH-2PG	C101O25H200P2	1876.39	1893.42	1898.37		DH-2PG	C101O26H200P2	1892.39	1909.41	1914.37
MH(NH2)	C92O10H181N	1461.38
DH(NH2)	C98O15H191N	1623.43
MH(Me)	C93O11H182	1476.38	1493.4	1498.36
DH(Me)	C99O16H192	1638.43	1655.45	1660.41
HPH(Me)	C99O19H193P	1718.39	1735.42	1740.38
						double charged
			adduct								adduct							adduct						adduct						adduct						adduct						adduct
GDGT-2		H+	NH4+	Na+	-H2O	2x H+		OH-GDGT-2		H+	NH4+	Na+			diOH-GDGT-2		H+	NH4+	Na+		GDBT-2		H+	NH4+	Na+		GDPT-2		H+	NH4+	Na+		GDD-2		H+	NH4+	Na+		OH-GDD-2		H+	NH4+	Na+
	elemental composition								elemental composition							elemental composition						elemental composition						elemental composition						elemental composition						elemental composition
core	C86O6H168	1298.29						core	C86O7H168	1314.29					core	C86O8H168	1330.28				core	C87O6H170	1312.31				core	C88O6H172	1326.32				core	C83O5H164	1242.27				core	C83O6H164	1258.26
MH	C92O11H178	1460.34	1477.37	1482.33				MH	C92O12H178	1476.34	1493.37	1498.32			MH	C92O13H178	1492.33	1509.36	1514.32		MH	C93O11H180	1474.36	1491.39	1496.34		MH	C94O11H182	1488.38	1505.4	1510.36		MH	C89O10H174	1404.32	1421.34	1426.3		MH	C89O11H174	1420.31	1437.34	1442.29
DH	C98O16H188	1622.4	1639.42	1644.38				DH	C98O17H188	1638.39	1655.42	1660.37			DH	C98O18H188	1654.39	1671.41	1676.37		DH	C99O16H190	1636.41	1653.44	1658.39		DH	C100O16H192	1650.43	1667.45	1672.41		DH	C95O15H184	1566.37	1583.4	1588.35		DH	C95O16H184	1582.37	1599.39	1604.35
TH	C104O21H198	1784.45	1801.48	1806.43				TH	C104O22H198	1800.44	1817.47	1822.43			TH	C104O23H198	1816.44	1833.47	1838.42		TH	C105O21H200	1798.47	1815.49	1820.45		TH	C106O21H202	1812.48	1829.51	1834.46		TH	C101O20H194	1728.42	1745.45	1750.41		TH	C101O21H194	1744.42	1761.45	1766.4
TetraH	C110O26H208	1946.5	1963.53	1968.48				TetraH	C110O27H208	1962.5	1979.52	1984.48			TetraH	C110O28H208	1978.49	1995.52	2000.47		TetraH	C111O26H210	1960.52	1977.54	1982.5		TetraH	C112O26H212	1974.53	1991.56	1996.52		TetraH	C107O25H204	1890.48	1907.5	1912.46		TetraH	C107O26H204	1906.47	1923.5	1928.45
PH	C92O14H179P	1540.31	1557.34	1562.29				PH	C92O15H179P	1556.31	1573.33	1578.29			PH	C92O16H179P	1572.3	1589.33	1594.28		PH	C93O14H181P	1554.33	1571.35	1576.31		PH	C94O14H183P	1568.34	1585.37	1590.32		PH	C89O13H175P	1484.28	1501.31	1506.27		PH	C89O14H175P	1500.28	1517.31	1522.26
HPH	C98O19H189P	1702.36	1719.39	1724.35				HPH	C98O20H189P	1718.36	1735.38	1740.34			HPH	C98O21H189P	1734.35	1751.38	1756.34		HPH	C99O19H191P	1716.38	1733.41	1738.36		HPH	C100O19H193P	1730.39	1747.42	1752.38		HPH	C95O18H185P	1646.34	1663.36	1668.32		HPH	C95O19H185P	1662.33	1679.36	1684.31
DH-PH	C104O24H199P	1864.42	1881.44	1886.4				DH-PH	C104O25H199P	1880.41	1897.44	1902.39			DH-PH	C104O26H199P	1896.41	1913.43	1918.39		DH-PH	C105O24H201P	1878.43	1895.46	1900.41		DH-PH	C106O24H203P	1892.45	1909.47	1914.43		DH-PH	C101O23H195P	1808.39	1825.42	1830.37		DH-PH	C101O24H195P	1824.38	1841.41	1846.37
Glua	C92O12H176	1474.32	1491.35	1496.31				Glua	C92O13H176	1490.32	1507.34	1512.3			Glua	C92O14H176	1506.31	1523.34	1528.3		Glua	C93O12H178	1488.34	1505.37	1510.32		Glua	C94O12H180	1502.35	1519.38	1524.34		Glua	C89O11H172	1418.3	1435.32	1440.28		Glua	C89O12H172	1434.29	1451.32	1456.27
HGlua	C98O17H186	1636.38	1653.4	1658.36				HGlua	C98O18H186	1652.37	1669.4	1674.35			Hglua	C98O19H186	1668.37	1685.39	1690.35		Hglua	C100O17H188	1650.39	1667.42	1672.37		Hglua	C101O17H190	1664.41	1681.43	1686.39		Hglua	C95O16H182	1580.35	1597.38	1602.33		Hglua	C95O17H182	1596.34	1613.37	1618.33
diHGlua	C104O22H196	1798.43	1815.46	1820.41				diHGlua	C104O23H196	1814.42	1831.45	1836.41			diHGlua	C104O24H196	1830.42	1847.45	1852.4		diHGlua	C106O22H198	1812.44	1829.47	1834.43		diHGlua	C107O22H200	1826.46	1843.49	1848.44		diHGlua	C103O21H192	1742.4	1759.43	1764.38		diHGlua	C103O22H192	1758.4	1775.42	1780.38
PG	C89O11PH175	1452.29	1469.32	1474.28				PG	C89O12PH175	1468.29	1485.32	1490.27			PG	C89O13PH175	1484.28	1501.31	1506.27		PG	C90O11PH177	1466.31	1483.34	1488.29		PG	C91O11PH179	1480.33	1497.35	1502.31		PG	C86O10PH171	1396.27	1413.29	1418.25		PG	C86O11PH171	1412.26	1429.29	1434.25
2PG	C92O16P2H182	1606.3	1623.32	1628.28				2PG	C92O17P2H182	1622.29	1639.32	1644.27			2PG	C92O18P2H182	1638.29	1655.31	1660.27		2PG	C93O16P2H184	1620.31	1637.34	1642.3		2PG	C94O16P2H186	1634.33	1651.36	1656.31		2PG	C89O15P2H178	1550.27	1567.3	1572.25		2PG	C89O16P2H178	1566.27	1583.29	1588.25
MH-PG	C95O16H185P	1614.35	1631.37	1636.33		805.662		MH-PG	C95O17H185P	1630.34	1647.37	1652.32			MH-PG	C95O18H185P	1646.34	1663.36	1668.32		MH-PG	C96O16H187P	1628.36	1645.39	1650.34		MH-PG	C97O16H189P	1642.38	1659.41	1664.36		MH-PG	C92O15H181P	1558.32	1575.35	1580.3		MH-PG	C92O16H181P	1574.32	1591.34	1596.3
DH-PG	C101O21H195P	1776.4	1793.43	1798.38		886.688		DH-PG	C101O22H195P	1792.4	1809.42	1814.38			DH-PG	C101O23H195P	1808.39	1825.42	1830.37		DH-PG	C102O21H197P	1790.42	1807.44	1812.4		DH-PG	C103O21H199P	1804.43	1821.46	1826.41		DH-PG	C98O20H191P	1720.37	1737.4	1742.36		DH-PG	C98O21H191P	1736.37	1753.4	1758.35
MH-2PG	C98O21H192P2	1768.35	1785.38	1790.33				MH-2PG	C98O22H192P2	1784.35	1801.37	1806.33			MH-2PG	C98O23H192P2	1800.34	1817.37	1822.32		MH-2PG	C99O21H194P2	1782.37	1799.39	1804.35		MH-2PG	C100O21H196P2	1796.38	1813.41	1818.36		MH-2PG	C95O20H188P2	1712.32	1729.35	1734.31		MH-2PG	C95O21H188P2	1728.32	1745.35	1750.3
DH-2PG	C104O26H202P2	1930.4	1947.43	1952.39				DH-2PG	C104O27H202P2	1946.4	1963.42	1968.38			DH-2PG	C104O28H202P2	1962.39	1979.42	1984.38		DH-2PG	C105O26H204P2	1944.42	1961.45	1966.4		DH-2PG	C106O26H206P2	1958.43	1975.46	1980.42		DH-2PG	C101O25H198P2	1874.38	1891.4	1896.36		DH-2PG	C101O26H198P2	1890.37	1907.4	1912.35
MH(NH2)	C92O10H179N	1459.36
DH(NH2)	C98O15H189N	1621.41
MH(Me)	C93O11H180	1474.36	1491.39	1496.34
DH(Me)	C99O16H190	1636.41	1653.44	1658.39
HPH(Me)	C99O19H191P	1716.38	1733.41	1738.36
			adduct								adduct							adduct																		adduct						adduct
GDGT-3		H+	NH4+	Na+				OH-GDGT-3		H+	NH4+	Na+			diOH-GDGT-3		H+	NH4+	Na+														GDD-3		H+	NH4+	Na+		OH-GDD-3		H+	NH4+	Na+
	elemental composition								elemental composition							elemental composition																		elemental composition						elemental composition
core	C86O6H166	1296.28						core	C86O7H166	1312.27					core	C86O8H166	1328.27																core	C83O5H162	1240.25				core	C83O6H162	1256.24
MH	C92O11H176	1458.33	1475.36	1480.31				MH	C92O12H176	1474.32	1491.35	1496.31			MH	C92O13H176	1490.32	1507.34	1512.3														MH	C89O10H172	1402.3	1419.33	1424.28		MH	C89O11H172	1418.3	1435.32	1440.28
DH	C98O16H186	1620.38	1637.41	1642.36				DH	C98O17H186	1636.38	1653.4	1658.36			DH	C98O18H186	1652.37	1669.4	1674.35														DH	C95O15H182	1564.36	1581.38	1586.34		DH	C95O16H182	1580.35	1597.38	1602.33
TH	C104O21H196	1782.43	1799.46	1804.42				TH	C104O22H196	1798.43	1815.46	1820.41			TH	C104O23H196	1814.42	1831.45	1836.41														TH	C101O20H192	1726.41	1743.43	1748.39		TH	C101O21H192	1742.4	1759.43	1764.38
TetraH	C110O26H206	1944.49	1961.51	1966.47				TetraH	C110O27H206	1960.48	1977.51	1982.46			TetraH	C110O28H206	1976.48	1993.5	1998.46														TetraH	C107O25H202	1888.46	1905.49	1910.44		TetraH	C107O26H202	1904.46	1921.48	1926.44
PH	C92O14H177P	1538.29	1555.32	1560.28				PH	C92O15H177P	1554.29	1571.32	1576.27			PH	C92O16H177P	1570.28	1587.31	1592.27														PH	C89O13H173P	1482.27	1499.3	1504.25		PH	C89O14H173P	1498.26	1515.29	1520.25
HPH	C98O19H187P	1700.35	1717.37	1722.33				HPH	C98O20H187P	1716.34	1733.37	1738.32			HPH	C98O21H187P	1732.34	1749.36	1754.32														HPH	C95O18H183P	1644.32	1661.35	1666.3		HPH	C95O19H183P	1660.32	1677.34	1682.3
DH-PH	C104O24H197P	1862.4	1879.43	1884.38				DH-PH	C104O25H197P	1878.4	1895.42	1900.38			DH-PH	C104O26H197P	1894.39	1911.42	1916.37														DH-PH	C101O23H193P	1806.37	1823.4	1828.36		DH-PH	C101O24H193P	1822.37	1839.4	1844.35
Glua	C92O12H174	1472.31	1489.33	1494.29				Glua	C92O13H174	1488.3	1505.33	1510.28			Glua	C92O14H174	1504.3	1521.32	1526.28														Glua	C89O11H170	1416.28	1433.31	1438.26		Glua	C89O12H170	1432.28	1449.3	1454.26
HGlua	C98O17H184	1634.36	1651.39	1656.34				Hglua	C98O18H184	1650.36	1667.38	1672.34			Hglua	C98O19H184	1666.35	1683.38	1688.33														Hglua	C95O16H180	1578.33	1595.36	1600.32		Hglua	C95O17H180	1594.33	1611.36	1616.31
diHGlua	C104O22H194	1796.41	1813.44	1818.4				diHGlua	C104O23H194	1812.41	1829.43	1834.39			diHGlua	C104O24H194	1828.4	1845.43	1850.39														diHGlua	C103O21H190	1740.39	1757.41	1762.37		diHGlua	C103O22H190	1756.38	1773.41	1778.36
PG	C89O11PH173	1450.28	1467.31	1472.26				PG	C89O12PH173	1466.27	1483.3	1488.26			PG	C89O13PH173	1482.27	1499.3	1504.25														PG	C86O10PH169	1394.25	1411.28	1416.23		PG	C86O11PH169	1410.25	1427.27	1432.23
2PG	C92O16P2H180	1604.28	1621.31	1626.26				2PG	C92O17P2H180	1620.28	1637.3	1642.26			2PG	C92O18P2H180	1636.27	1653.3	1658.25														2PG	C89O15P2H176	1548.26	1565.28	1570.24		2PG	C89O16P2H176	1564.25	1581.28	1586.23
MH-PG	C95O16H183P	1612.33	1629.36	1634.31				MH-PG	C95O17H183P	1628.33	1645.35	1650.31			MH-PG	C95O18H183P	1644.32	1661.35	1666.3														MH-PG	C92O15H179P	1556.31	1573.33	1578.29		MH-PG	C92O16H179P	1572.3	1589.33	1594.28
DH-PG	C101O21H193P	1774.38	1791.41	1796.37				DH-PG	C101O22H193P	1790.38	1807.41	1812.36			DH-PG	C101O23H193P	1806.37	1823.4	1828.36														DH-PG	C98O20H188P	1718.36	1735.38	1740.34		DH-PG	C98O21H189P	1734.35	1751.38	1756.34
MH-2PG	C98O21H190P2	1766.33	1783.36	1788.32				MH-2PG	C98O22H190P2	1782.33	1799.36	1804.31			MH-2PG	C98O24H190P2	1798.32	1815.35	1820.31														MH-2PG	C95O20H187P2	1710.31	1727.34	1732.29		MH-2PG	C95O21H186P2	1726.3	1743.33	1748.29
DH-2PG	C104O26H200P2	1928.39	1945.41	1950.37				DH-2PG	C104O27H200P2	1944.38	1961.41	1966.36			DH-2PG	C104O287H200P2	1960.38	1977.4	1982.36														DH-2PG	C101O25H196P2	1872.36	1889.39	1894.34		DH-2PG	C101O26H196P2	1888.36	1905.38	1910.34
MH(NH2)	C92O10H177N	1457.34
DH(NH2)	C98O15H187N	1619.4
MH(Me)	C93O11H178	1472.34	1489.37	1494.33
DH(Me)	C99O16H188	1634.4	1651.42	1656.38
HPH(Me)	C99O19H189P	1714.36	1731.39	1736.35
			adduct								adduct							adduct																		adduct						adduct
GDGT-4		H+	NH4+	Na+				OH-GDGT-4		H+	NH4+	Na+			diOH-GDGT-4		H+	NH4+	Na+														GDD-4		H+	NH4+	Na+		OH-GDD-4		H+	NH4+	Na+
	elemental composition								elemental composition							elemental composition																		elemental composition						elemental composition
core	C86O6H164	1294.26						core	C86O7H164	1310.25					core	C86O8H166	1326.25																core	C83O5H160	1238.23				core	C83O6H160	1254.23
MH	C92O11H174	1456.31	1473.34	1478.29				MH	C92O12H174	1472.31	1489.33	1494.29			MH	C92O13H174	1488.3	1505.33	1510.28														MH	C89O10H170	1400.29	1417.31	1422.27		MH	C89O11H170	1416.28	1433.31	1438.26
DH	C98O16H184	1618.37	1635.39	1640.35				DH	C98O17H184	1634.36	1651.39	1656.34			DH	C98O18H184	1650.36	1667.38	1672.34														DH	C95O15H180	1562.34	1579.37	1584.32		DH	C95O16H180	1578.33	1595.36	1600.32
TH	C104O21H194	1780.42	1797.45	1802.4				TH	C104O22H194	1796.41	1813.44	1818.4			TH	C104O32H194	1812.41	1829.43	1834.39														TH	C101O20H190	1724.39	1741.42	1746.37		TH	C101O21H190	1740.39	1757.41	1762.37
TetraH	C110O26H204	1942.47	1959.5	1964.45				TetraH	C110O27H204	1958.47	1975.49	1980.45			TetraH	C110O28H204	1974.46	1991.49	1996.44														TetraH	C107O25H200	1886.45	1903.47	1908.43		TetraH	C107O26H200	1902.44	1919.47	1924.42
PH	C92O14H175P	1536.28	1553.31	1558.26				PH	C92O15H175P	1552.27	1569.3	1574.26			PH	C92O16H175P	1568.27	1585.3	1590.25														PH	C89O13H171P	1480.25	1497.28	1502.23		PH	C89O14H171P	1496.25	1513.27	1518.23
HPH	C98O19H185P	1698.33	1715.36	1720.31				HPH	C98O20H185P	1714.33	1731.35	1736.31			HPH	C98O21H185P	1730.32	1747.35	1752.3														HPH	C95O18H181P	1642.31	1659.33	1664.29		HPH	C95O19H181P	1658.3	1675.33	1680.28
DH-PH	C104O24H195P	1860.38	1877.41	1882.37				DH-PH	C104O25H195P	1876.38	1893.41	1898.36			DH-PH	C104O26H193P	1892.37	1909.4	1914.36														DH-PH	C101O23H191P	1804.36	1821.39	1826.34		DH-PH	C101O24H191P	1820.35	1837.38	1842.34
Glua	C92O12H172	1470.29	1487.32	1492.27				Glua	C92O13H172	1486.29	1503.31	1508.27			Glua	C92O14H172	1502.28	1519.31	1524.26														Glua	C89O11H168	1414.27	1431.29	1436.25		Glua	C89O12H168	1430.26	1447.29	1452.24
HGlua	C98O17H182	1632.34	1649.37	1654.33				HGlua	C98O18H182	1648.34	1665.37	1670.32			HGlua	C98O19H182	1664.33	1681.36	1686.32														Hglua	C95O16H178	1576.32	1593.35	1598.3		Hglua	C95O17H178	1592.31	1609.34	1614.3
diHGlua	C104O22H192	1794.4	1811.42	1816.38				diHGlua	C104O23H192	1810.39	1827.42	1832.37			diHGlua	C104O24H192	1826.39	1843.41	1848.37														diHGlua	C103O21H188	1738.37	1755.4	1760.35		diHGlua	C103O22H188	1754.37	1771.39	1776.35
PG	C89O11PH171	1448.26	1465.29	1470.25				PG	C89O12PH171	1464.26	1481.28	1486.24			PG	C89O13PH169	1480.25	1497.28	1502.23														PG	C86O10PH167	1392.24	1409.26	1414.22		PG	C86O11PH167	1408.23	1425.26	1430.21
2PG	C92O16P2H178	1602.27	1619.29	1624.25				2PG	C92O17P2H178	1618.26	1635.29	1640.24			2PG	C92O18P2H176	1634.26	1651.28	1656.24														2PG	C89O15P2H174	1546.24	1563.27	1568.22		2PG	C89O16P2H174	1562.23	1579.26	1584.22
MH-PG	C95O16H181P	1610.32	1627.34	1632.3				MH-PG	C95O17H181P	1626.31	1643.34	1648.29			MH-PG	C95O18H179P	1642.31	1659.33	1664.29														MH-PG	C92O15H177P	1554.29	1571.32	1576.27		MH-PG	C92O16H177P	1570.28	1587.31	1592.27
DH-PG	C101O21H191P	1772.37	1789.4	1794.35				DH-PG	C101O22H191P	1788.36	1805.39	1810.35			DH-PG	C101O23H189P	1804.36	1821.39	1826.34														DH-PG	C98O20H187P	1716.34	1733.37	1738.32		DH-PG	C98O21H187P	1732.34	1749.36	1754.32
MH-2PG	C98O21H188P2	1764.32	1781.35	1786.3				MH-2PG	C98O22H188P2	1780.31	1797.34	1802.3			MH-2PG	C98O23H186P2	1796.31	1813.34	1818.29														MH-2PG	C95O20H184P2	1708.29	1725.32	1730.27		MH-2PG	C95O21H184P2	1724.29	1741.31	1746.27
DH-2PG	C104O26H198P2	1926.37	1943.4	1948.35				DH-2PG	C104O27H198P2	1942.37	1959.39	1964.35			DH-2PG	C104O28H196P2	1958.36	1975.39	1980.34														DH-2PG	C101O25H194P2	1870.35	1887.37	1892.33		DH-2PG	C101O26H194P2	1886.34	1903.37	1908.32
MH(NH2)	C92O10H175N	1455.33
DH(NH2)	C98O15H185N	1617.38
MH(Me)	C93O11H176	1470.33	1487.36	1492.31
DH(Me)	C99O16H186	1632.38	1649.41	1654.36
HPH(Me)	C99O19H187P	1712.35	1729.37	1734.33
			adduct								adduct							adduct																		adduct						adduct
GDGT-5/crenarchaeol		H+	NH4+	Na+				OH-GDGT-5/crenarchaeol		H+	NH4+	Na+			diOH-GDGT-5/crenarchaeol		H+	NH4+	Na+														GDD-5		H+	NH4+	Na+		OH-GDD-5		H+	NH4+	Na+
	elemental composition								elemental composition							elemental composition																		elemental composition						elemental composition
core	C86O6H162	1292.24						core	C86O7H162	1308.24					core	C86O8H162	1324.23																core	C83O5H158	1736.36				core	C83O6H158	1252.21
MH	C92O11H172	1454.3	1471.32	1476.28				MH	C92O12H172	1470.29	1487.32	1492.27			MH	C92O13H172	1486.29	1503.31	1508.27														MH	C89O10H168	1398.27	1415.3	1420.25		MH	C89O11H168	1414.27	1431.29	1436.25
DH	C98O16H182	1616.35	1633.38	1638.33				DH	C98O17H182	1632.34	1649.37	1654.33			DH	C98O18H182	1648.34	1665.37	1670.32														DH	C95O15H178	1560.32	1577.35	1582.31		DH	C95O16H178	1576.32	1593.35	1598.3
TH	C104O21H192	1778.4	1795.43	1800.38				TH	C104O22H192	1794.4	1811.42	1816.38			TH	C104O23H192	1810.39	1827.42	1832.37														TH	C101O20H188	1722.38	1739.4	1744.36		TH	C101O21H188	1738.37	1755.4	1760.35
TetraH	C110O26H202	1940.46	1957.48	1962.44				TetraH	C110O27H202	1956.45	1973.48	1978.43			TetraH	C110O28H202	1972.45	1989.47	1994.43														TetraH	C107O25H198	1884.43	1901.46	1906.41		TetraH	C107O26H198	1900.42	1917.45	1922.41
PH	C92O14H173P	1534.26	1551.29	1556.25				PH	C92O15H173P	1550.26	1567.29	1572.24			PH	C92O16H173P	1566.25	1583.28	1588.24														PH	C89O13H169P	1478.24	1495.26	1500.22		PH	C89O14H169P	1494.23	1511.26	1516.21
HPH	C98O19H183P	1696.32	1713.34	1718.3				HPH	C98O20H183P	1712.31	1729.34	1734.29			HPH	C98O21H183P	1728.31	1745.33	1750.29														HPH	C95O18H179P	1640.29	1657.32	1662.27		HPH	C95O19H179P	1656.29	1673.31	1678.27
DH-PH	C104O24H193P	1858.37	1875.4	1880.35				DH-PH	C104O25H193P	1874.36	1891.39	1896.35			DH-PH	C104O26H193P	1890.36	1907.39	1912.34														DH-PH	C101O23H189P	1802.34	1819.37	1824.32		DH-PH	C101O24H189P	1818.34	1835.36	1840.32
Glua	C92O12H170	1468.28	1485.3	1490.26				Glua	C92O13H170	1484.27	1501.3	1506.25			Glua	C92O14H170	1500.27	1517.29	1522.25														Glua	C89O11H166	1412.25	1429.28	1434.23		Glua	C89O12H166	1428.25	1445.27	1450.23
HGlua	C98O17H180	1630.33	1647.36	1652.31				HGlua	C98O18H180	1646.32	1663.35	1668.31			HGlua	C98O19H180	1662.32	1679.35	1684.3														Hglua	C95O16H176	1574.3	1591.33	1596.29		Hglua	C95O17H176	1590.3	1607.32	1612.28
diHGlua	C104O22H190	1792.38	1809.41	1814.36				diHGlua	C104O23H190	1808.38	1825.4	1830.36			diHGlua	C104O24H190	1824.37	1841.4	1846.35														diHGlua	C103O21H186	1736.36	1753.38	1758.34		diHGlua	C103O22H186	1752.35	1769.38	1774.33
PG	C89O11PH169	1446.25	1463.27	1468.23				PG	C89O12PH169	1462.24	1479.27	1484.22			PG	C89O13PH169	1478.24	1495.26	1500.22														PG	C86O10PH165	1390.22	1407.25	1412.2		PG	C86O11PH165	1406.22	1423.24	1428.2
2PG	C92O16P2H176	1600.25	1617.28	1622.23				2PG	C92O17P2H176	1616.25	1633.27	1638.23			2PG	C92O18P2H176	1632.24	1649.27	1654.22														2PG	C89O15P2H172	1544.22	1561.25	1566.21		2PG	C89O16P2H172	1560.22	1577.25	1582.2
MH-PG	C95O16H179P	1608.3	1625.33	1630.28				MH-PG	C95O17H179P	1624.3	1641.32	1646.28			MH-PG	C95O18H179P	1640.29	1657.32	1662.27														MH-PG	C92O15H175P	1552.27	1569.3	1574.26		MH-PG	C92O16H175P	1568.27	1585.3	1590.25
DH-PG	C101O21H189P	1770.35	1787.38	1792.34				DH-PG	C101O22H189P	1786.35	1803.37	1808.33			DH-PG	C101O23H189P	1802.34	1819.37	1824.32														DH-PG	C98O20H185P	1714.33	1731.35	1736.31		DH-PG	C98O21H185P	1730.32	1747.35	1752.3
MH-2PG	C98O21H186P2	1762.3	1779.33	1784.29				MH-2PG	C98O22H186P2	1778.3	1795.32	1800.28			MH-2PG	C98O23H186P2	1794.29	1811.32	1816.28														MH-2PG	C95O20H182P2	1706.28	1723.3	1728.26		MH-2PG	C95O21H182P2	1722.27	1739.3	1744.25
DH-2PG	C104O26H196P2	1924.36	1941.38	1946.34				DH-2PG	C104O27H196P2	1940.35	1957.38	1962.33			DH-2PG	C104O28H196P2	1956.35	1973.37	1978.33														DH-2PG	C101O25H192P2	1868.33	1885.36	1890.31		DH-2PG	C101O26H192P2	1884.32	1901.35	1906.31
MH(NH2)	C92O10H173N	1453.31
DH(NH2)	C98O15H183N	1615.37
MH(Me)	C93O11H174	1468.31	1485.34	1490.29
DH(Me)	C99O16H184	1630.37	1647.39	1652.35
HPH(Me)	C99O19H185P	1710.33	1727.36	1732.31
